# Supplementary material for: Novel WT1 Missense Mutations in Han Chinese Women with Premature Ovarian Failure
Source: PubMed Central journal article supplement (PMC4566091; doi:10.1038/srep13983), 2015-09-11
Supplement: srep13983-s1.pdf [file srep13983-s1.pdf]

# Novel *WT1* Missense Mutations in Han Chinese Women with Premature Ovarian Failure

Huidan Wang <sup>1</sup>, Guangyu Li <sup>1</sup>, Jun Zhang <sup>2,3</sup>, Fei Gao <sup>2</sup>, Weiping Li <sup>4</sup>, Yingying Qin <sup>1,\*</sup>, Zi-Jiang Chen <sup>1,5,\*</sup>

## Supplementary information:

Supplementary Table S1 Primers used for amplification exons of the *WT1* gene

| Exon   | Primer sequence             | Tm (°C) | Length(bp) |
|--------|-----------------------------|---------|------------|
| Exon 1 | F1: GCCGGCCCCTCTTATTTGAGCT  | 66      | 979        |
|        | R1: GCTGCGGTCAAAGGGGTAGGA   |         |            |
| Exon 2 | F2: AAAGTCCTGGAGGCTTGTGG    | 59      | 449        |
|        | R2: GGAGGGAGACCCAGTCTTGTC   |         |            |
| Exon 3 | F3: AGGCTCAGGATCTCGTGTCT    | 55      | 497        |
|        | R3: GGTAATTCCTCCCAGTAAAG    |         |            |
| Exon 4 | F4: CTGTGCAGAGATCAGTGGGAT   | 55      | 485        |
|        | R4: GTGTCCTCAATATTCCTTGTTCC |         |            |
| Exon 5 | F5: TCTTTGCAGCCTCCGGTGGT    | 62      | 350        |
|        | R5: ATGCTACCCTGATTACCCACGTC |         |            |
| Exon 6 | F6: GAGCGAGACCTAGACCGTGAC   | 62      | 528        |
|        | R6: ACAGCCGCCTTATCAGACCC    |         |            |
| Exon 7 | F7: AGGTTTCATCTCAACAGCCACT  | 59      | 631        |
|        | R7: ACCACTCTGCTCTGCCTTTCT   |         |            |
| Exon 8 | F8: GCTCCCATTCATTTGTA ACTT  | 55      | 536        |
|        | R8: ATCACCTCATTCTTTGCTG     |         |            |
| Exon 9 | F9: GTTCCCAAGACAGAAGCAGG    | 57      | 581        |
|        | R9: ACAGTAGGGACCTGGCTTATCT  |         |            |

|         |                                                                  |    |     |
|---------|------------------------------------------------------------------|----|-----|
| Exon 10 | F10: GACTCATTCTTTATCTCCCACTTTC<br>R10: CATGATCAGCTATGGCTCTTCTTAC | 59 | 684 |
|---------|------------------------------------------------------------------|----|-----|

Supplementary Table S2 Primers used for qRT-PCR

| Gene  | Primer sequence              |
|-------|------------------------------|
| GAPDH | F: TGATGACATCAAGAAGGTGGTGAAG |
|       | R: TCCTTGGAGGCCATGTAGGCCAT   |
| Wt1   | F: CAAGGACTGCGAGAGAAGGTTT    |
|       | R: TGGTGTGGGTCTTCAGATGGT     |
| AMH   | F: CCACACCTCTCTCCACTGGTA     |
|       | R: GGCACAAAGGTTTCAGGGGG      |
| FSHR  | F: CCTTGCTCCTGGTCTCCTTG      |
|       | R: CTCGGTCACCTTGCTATCTTG     |
| LHR   | F: CTCGCCCCGACTATCTCTCAC     |
|       | R: ACGACCTCATTAAGTCCCCTG     |
| CYP19 | F: AACCCCATGCAGTATAATGTCAC   |
|       | R: AGGACCTGGTATTGAAGACGAG    |
| CDH1  | F: CGAGAGAGTTACCCTACATA      |
|       | R: GTGTTGGGGGCATCATCATC      |
| Par6b | F: GGAGCTGAGTTTCGTCGGTTT     |
|       | R: CGTAGCCCACCAACACGTC       |
